# Supplementary material
Source: PubMed Central journal article supplement (PMC4400776)
Supplement: JCM.02913-14_zjm999094252so1.pdf [file JCM.02913-14_zjm999094252so1.pdf]

Supplementary data

Figure S1: Example of surperimposed forward chromatograms resulting from a mixed of ITSa and ITSb alleles present in strain CBS7103

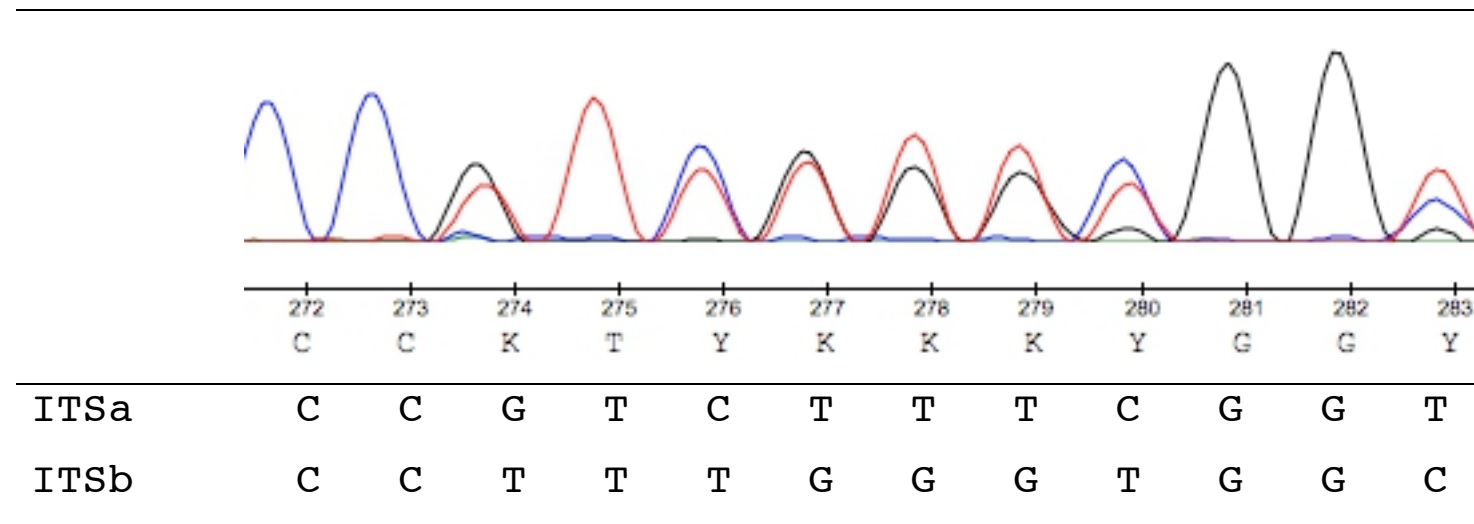

Table S1: Yeasts strains used in this study and their corresponding nucleotide sequence accession number in GenBank

| Species               | Strain designation at CBS and other culture collections |             | GenBank accession number           |                        |                                                |
|-----------------------|---------------------------------------------------------|-------------|------------------------------------|------------------------|------------------------------------------------|
|                       |                                                         |             | EF1                                | D1D2                   | ITS                                            |
| <i>C. inconspicua</i> | CBS180                                                  | NRRLY2029   | EF552464<br>This study<br>KM252819 | EF550240               | AB179767                                       |
| <i>C. inconspicua</i> |                                                         | CIU71062    |                                    | U71062                 |                                                |
| <i>C. inconspicua</i> |                                                         | UL325       |                                    | HQ641283               |                                                |
| <i>C. inconspicua</i> |                                                         | EXF-5648    |                                    | JF766626               |                                                |
| <i>C. inconspicua</i> |                                                         | 1.5         |                                    | JN417608               |                                                |
| <i>C. inconspicua</i> |                                                         | CNRMA9.403  |                                    |                        | KP131716                                       |
| <i>C. inconspicua</i> |                                                         | PMM10-1744L |                                    |                        | KP131718                                       |
| <i>C. inconspicua</i> |                                                         | CNRMA7.1481 |                                    |                        | KP131714                                       |
| <i>C. inconspicua</i> |                                                         |             |                                    |                        | AB179767                                       |
| <i>C. inconspicua</i> |                                                         | WM11        |                                    |                        | AJ853766                                       |
| <i>C. inconspicua</i> |                                                         | WM02.462    |                                    |                        | KP131719                                       |
| <i>C. inconspicua</i> |                                                         | CNRMA9.723  |                                    |                        | KP131717                                       |
| <i>C. inconspicua</i> |                                                         | CNRMA7.1482 |                                    |                        | KP131715                                       |
| <i>P. cactophila</i>  |                                                         | PMM08-858L  |                                    |                        | KP132499                                       |
| <i>P. cactophila</i>  |                                                         | PMM09-2821L |                                    |                        | KP132500                                       |
| <i>P. cactophila</i>  | CBS6926                                                 | NRRLY-10963 | EF552465<br>This study<br>252820   | EF550241               | This study<br>KM252828<br>KM252830<br>KM252831 |
| <i>P. cactophila</i>  | CBS7059                                                 |             | this study<br>KM252801             |                        | this study<br>KM252832<br>KM252833             |
| <i>P. cactophila</i>  | CBS2155                                                 |             | this study<br>KM252803             |                        | this study<br>KM252827                         |
| <i>P. cactophila</i>  | CBS6928                                                 |             | this study<br>KM252804             | this study<br>KM252821 | this study<br>KM252832                         |
| <i>P. cactophila</i>  | CBS7103                                                 |             |                                    |                        | This study<br>KM252828<br>KM252829<br>KM252830 |
| <i>P. cactophila</i>  |                                                         | IMAU5Y035   |                                    | GU460181               |                                                |
| <i>P. cactophila</i>  |                                                         | IMAU5Y040   |                                    | GU460184               |                                                |
| <i>P. cactophila</i>  |                                                         | IMAU5Y029   |                                    | GU460177               |                                                |
| <i>P. cactophila</i>  |                                                         | IMAU5Y023   |                                    | GU460174               |                                                |
| <i>P. cactophila</i>  |                                                         | YOH         |                                    | GQ179989               |                                                |
| <i>P. cactophila</i>  |                                                         | PCU75731    |                                    | U75731                 |                                                |
| <i>P. cactophila</i>  |                                                         | YB2         |                                    | KC512909               |                                                |
| <i>P. norvegensis</i> |                                                         | AB179768.1  |                                    |                        | AB179768                                       |
| <i>P. norvegensis</i> |                                                         | F2fp15      |                                    | JN110384               |                                                |
| <i>P. norvegensis</i> |                                                         | F2fp21      |                                    | JN110386               |                                                |
| <i>P. norvegensis</i> | CBS1922                                                 | IFO1020     |                                    | AJ508574               | AB278161                                       |
| <i>P. norvegensis</i> |                                                         | TY27        |                                    | FJ972223               |                                                |
| <i>P. norvegensis</i> |                                                         | ATCC20686   |                                    | JQ070172               |                                                |
| <i>P. norvegensis</i> |                                                         | PNU75730    |                                    | U75730                 |                                                |
| <i>P. norvegensis</i> |                                                         | PUMY020     |                                    | JN391355               |                                                |
| <i>P. norvegensis</i> |                                                         | PUMY021     |                                    | JN391356               |                                                |
| <i>P. norvegensis</i> |                                                         | L6058       |                                    |                        | KC408998                                       |
| <i>P. norvegensis</i> | CBS1911                                                 |             |                                    |                        | AB278162                                       |

|                            |            |                   |                        |                                        |                        |
|----------------------------|------------|-------------------|------------------------|----------------------------------------|------------------------|
| <i>P. norvegensis</i>      |            | ATCC20686         |                        |                                        | JQ070096               |
| <i>P. norvegensis</i>      | CBS2327    |                   |                        |                                        | AB278170               |
| <i>P. norvegensis</i>      |            | NCPF3861          |                        |                                        | AM74530                |
| <i>P. norvegensis</i>      |            | NYSDOH83MR<br>168 |                        |                                        | AY139789               |
| <i>P. norvegensis</i>      | AB179768.1 |                   |                        |                                        | AB179768               |
| <i>P. norvegensis</i>      | CBS2145    |                   |                        |                                        | AB278169               |
| <i>P. norvegensis</i>      |            | ST3481-03         |                        |                                        | AY939799               |
| <i>P. norvegensis</i>      | CBS2144    |                   |                        |                                        | AB278168               |
| <i>P. norvegensis</i>      | CBS2128    |                   |                        |                                        | AB278167               |
| <i>P. norvegensis</i>      | CBS2126    |                   |                        |                                        | AB278166               |
| <i>P. norvegensis</i>      | CBS2125    |                   |                        |                                        | AB278165               |
| <i>P. norvegensis</i>      | CBS1921    |                   |                        |                                        | AB278163               |
| <i>P. norvegensis</i>      | CBS1953    |                   |                        |                                        | AB278164               |
| <i>P. norvegensis</i>      | CBS6564    | NRRLY7687         | EF552463               | EF550239                               | This study<br>KM252826 |
| <i>P. norvegensis</i>      |            | PMM08-1253L       |                        |                                        | KP132518               |
| <i>P. norvegensis</i>      |            | PMM09-1823L       |                        |                                        | KP132519               |
| <i>P. norvegensis</i>      |            | PMM09-768L        |                        |                                        | KP132520               |
| <i>P. norvegensis</i>      |            | WM881             |                        |                                        | KP132523               |
| <i>P. norvegensis</i>      |            | WM887             |                        |                                        | KP132528               |
| <i>P. norvegensis</i>      |            | WM877             |                        |                                        | KP068971               |
| <i>P. norvegensis</i>      |            | WM875             |                        |                                        | KP132521               |
| <i>P. norvegensis</i>      |            | WM885             |                        |                                        | KP132526               |
| <i>P. norvegensis</i>      |            | WM884             |                        |                                        | KP132525               |
| <i>P. norvegensis</i>      |            | WM883             |                        |                                        | KP132524               |
| <i>P. norvegensis</i>      |            | WM879             |                        |                                        | KP132522               |
| <i>P. norvegensis</i>      |            | WM886             |                        |                                        | KP132527               |
| <i>P. norvegensis</i>      |            | CNRMA7.1213       |                        |                                        | KP132517               |
| <i>P. norvegensis</i>      |            | WM999             |                        |                                        | KP132529               |
| <i>P. insulana</i>         | CBS11169   | TSU00-106.5       | This study<br>KM252818 | EU747339.1<br>/ this study<br>KM252825 | This study<br>KM252834 |
| <i>P. pseudocactophila</i> | CBS6929    | NRRLY17239        | EF552466               | EF550242<br>this study<br>KM252822     |                        |
| <i>P. pseudocactophila</i> |            | PPU75732          |                        | U75732                                 |                        |
| <i>P. kudriavzevii</i>     | ATCC24210  | NRRLY-5396        | EF552446               | EF550222                               | AY939808               |

Table S2: Blastn results of the complete or uncomplete ITS1/4 sequences tested in this study.

| Strain                                                                              | 5'-end chromatogram<br>readable size | 3'-end chromatogram<br>readable size | Genbank best hits<br>of consensus sequence species | Genbank best hits<br>of accession number | Maximum %<br>identity              | E value |
|-------------------------------------------------------------------------------------|--------------------------------------|--------------------------------------|----------------------------------------------------|------------------------------------------|------------------------------------|---------|
| Strains identified as <i>C. inconspicua</i> or <i>P. cactophila</i> using MALDI-TOF |                                      |                                      |                                                    |                                          |                                    |         |
| SA1461, SA1463, CBS6928, CBS2155, CBS180                                            | 369- 373                             | 369- 373                             | <i>C. inconspicua</i>                              | AB179761                                 | 99% or 99% <sup>1</sup><br>or 100% | 0.0     |
| SA952, SA1635, SA1459, CBS7059                                                      | 68                                   | 29-68                                | <i>C. ernobii</i>                                  | EU343827                                 | 100%                               | 2e-26   |
|                                                                                     |                                      |                                      | <i>C. inconspicua</i>                              | AM745303                                 | 100%                               | 2e-26   |
| SA1729, SA1730, SA1457, SA1458, SA1462, SA2185, CBS7103                             | 265                                  | 68-74                                | <i>C. ernobii</i>                                  | EU343827                                 | 100% or 99% <sup>1</sup>           | 4e-135  |
|                                                                                     |                                      |                                      | <i>C. inconspicua</i>                              | AB179767                                 | 100% or 99% <sup>1</sup>           | 4e-135  |
| CBS6926                                                                             | 0 <sup>2</sup>                       | 0 <sup>2</sup>                       | NA                                                 | NA                                       | NA                                 | NA      |
| Strains identified as <i>P. norvegensis</i> using MALDI-TOF                         |                                      |                                      |                                                    |                                          |                                    |         |
| CBS6564                                                                             | 404                                  | 404                                  | <i>P. norvegensis</i>                              | AB278164                                 | 99% <sup>1</sup>                   | 0.0     |
| SA1460                                                                              | 88                                   | 0 <sup>2</sup>                       | <i>P. norvegensis</i>                              | KC408998                                 | 98% <sup>1</sup>                   | 4e-35   |
| SA2546                                                                              | 0 <sup>2</sup>                       | 0 <sup>2</sup>                       | NA                                                 | NA                                       | NA                                 | NA      |
| Strains not identified using MALDI-TOF                                              |                                      |                                      |                                                    |                                          |                                    |         |
| CBS11169                                                                            | 0 <sup>2</sup>                       | 306                                  | Uncultured fungus clone                            | KJ173550                                 | 95%                                | 2e-132  |
|                                                                                     |                                      |                                      | <i>C. inconspicua</i>                              | AM711386                                 | 95%                                | 3e-131  |
|                                                                                     |                                      |                                      |                                                    | NR111116                                 | 94%                                | 2e-128  |
| CBS6929                                                                             | 51                                   | 101                                  | <i>C. ernobii</i>                                  | EU343827                                 | 84%                                | 3e-18   |
|                                                                                     |                                      |                                      | <i>C. inconspicua</i>                              | AB179767                                 | 85%                                | 6e-20   |
|                                                                                     |                                      |                                      | <i>P. norvegensis</i>                              | AB278164                                 | 80%                                | 1e-15   |

<sup>1</sup> percentage could be 100% when considering point mutation of heterozygoty

<sup>2</sup> fully uninterpretable

Table S3: Blastn results of complete or incomplete D1/D2 domain sequences tested in this study.

| Strains                                                                             | 5'-end chromatogram<br>readable size | 3'-end chromatogram<br>readable size | GenBank Best hits of<br>consensus sequence species | GenBank Best hits<br>accession number | Maximum<br>identity | % E value |
|-------------------------------------------------------------------------------------|--------------------------------------|--------------------------------------|----------------------------------------------------|---------------------------------------|---------------------|-----------|
| Strains identified as <i>C. inconspicua</i> or <i>P. cactophila</i> using MALDI-TOF |                                      |                                      |                                                    |                                       |                     |           |
| SA1730, CBS6926, 573-574                                                            |                                      | 573-574                              | <i>P. cactophila</i>                               | GU460184                              | 99% <sup>1</sup>    | 0.0       |
| CBS6928, CBS180                                                                     |                                      |                                      | <i>C. inconspicua</i>                              | EF550240                              |                     |           |
| SA1729, SA2185, 55-68-71-108                                                        |                                      | 0                                    | <i>C. inconspicua</i>                              | EF550240                              | 99% <sup>1</sup>    | 6e-46     |
| CBS7103, CBS7059                                                                    |                                      |                                      |                                                    |                                       |                     |           |
| CBS2155                                                                             | 51                                   | 0                                    | <i>C. inconspicua</i>                              | EF550240                              | 100%                | 3e-17     |
|                                                                                     |                                      |                                      | <i>P. norvegensis</i>                              | KF268295                              | 100%                | 3e-17     |
|                                                                                     |                                      |                                      | <i>P. cactophila</i>                               | GU460184                              | 100%                | 3e-17     |
| SA952, SA1635, SA1457, SA1458, SA1459, SA1461, SA1462, SA1463                       | 0 <sup>2</sup> -12                   | 0 <sup>2</sup>                       | NA                                                 | NA                                    | NA                  | NA        |
| Strains identified as <i>P. norvegensis</i> using MALDI-TOF                         |                                      |                                      |                                                    |                                       |                     |           |
| CBS6564                                                                             | 571                                  | 571                                  | <i>P. norvegensis</i>                              | EF550239                              | 99% <sup>1</sup>    | 0.0       |
| SA2546                                                                              | 571                                  | 571                                  | <i>P. norvegensis</i>                              | FJ972223                              | 99% <sup>1</sup>    | 0.0       |
| SA1460                                                                              | 0-12                                 | 0                                    | NA                                                 | NA                                    | NA                  | NA        |
| Strains not identified using MALDI-TOF                                              |                                      |                                      |                                                    |                                       |                     |           |
| CBS11169                                                                            | 604                                  | 604                                  | <i>P. insulana</i>                                 | EU747343                              | 99% <sup>1</sup>    | 0.0       |
| CBS6929                                                                             | 575                                  | 575                                  | <i>P. pseudocactophila</i>                         | EF550242                              | 99% <sup>1</sup>    | 0.0       |

<sup>1</sup> percentage could be 100% when considering heterozygous point mutations <sup>2</sup> fully uninterpretable

Table S4: Blastn results of EF-1 $\alpha$  sequences obtained from the strains tested in this study.

| Strains                                                                                                                                | fragment size in bp | Blastn best hit of consensus<br>sequence species                                | GenBank best hit<br>(accession number) | Maximum % identity                   | E value |
|----------------------------------------------------------------------------------------------------------------------------------------|---------------------|---------------------------------------------------------------------------------|----------------------------------------|--------------------------------------|---------|
| Strains identified as <i>C. inconspicua</i> or <i>P. cactophila</i> using MALDI-TOF                                                    |                     |                                                                                 |                                        |                                      |         |
| SA952, SA1457, SA1458, SA1459, SA1461, SA1462,<br>SA1463, SA1635, SA1729, SA1730, SA2185<br>CBS180, CBS7103, CBS2155, CBS7059, CBS6928 | 780                 | <i>C. inconspicua</i><br><i>P. cactophila</i>                                   | EF552464<br>EF552465                   | 99% <sup>1</sup><br>98% <sup>1</sup> | 0.0     |
| CBS6926                                                                                                                                | 780                 | <i>P. cactophila</i><br><i>C. inconspicua</i>                                   | EF552465<br>EF552464                   | 98% <sup>1</sup><br>98% <sup>1</sup> | 0.0     |
| Strains identified as <i>P. norvegensis</i> using MALDI-TOF                                                                            |                     |                                                                                 |                                        |                                      |         |
| SA1460, SA2546,<br>CBS6564                                                                                                             | 780                 | <i>P. norvegensis</i>                                                           | EF552463                               | 100%                                 | 0.0     |
| Strains not identified using MALDI-TOF                                                                                                 |                     |                                                                                 |                                        |                                      |         |
| CBS11169                                                                                                                               | 809                 | <i>C. inconspicua</i> ,<br><i>P. cactophila</i> ,<br><i>P. pseudocactophila</i> | EF552464.1<br>EF552465.1<br>EF552466.1 | 98%<br>98%<br>98%                    | 0.0     |
| CBS6929                                                                                                                                | 780                 | <i>P. pseudocactophila</i>                                                      | EF552466                               | 100%                                 | 0.0     |

<sup>1</sup>percentage could be 100% when considering heterozygous point mutations

Table S5: Nucleotide divergence within and between the species of the *P. cactophila* clade. ITS region, D1D2 domain and EF-1 $\alpha$  gene fragment, were analysed, using complete sequences obtained from our study, and from GenBank. The number of base substitutions per site from averaging over all sequence pairs within each group and between groups are shown. Analyses were conducted using the Maximum Composite Likelihood model. PCCI: *P. cactophila* plus *C. inconspicua*, PC: *P. cactophila*, CI: *C. inconspicua*, PN: *P. norvegensis*, PP: *P. pseudocactophila*, PI: *P. insulana*, CK: *C. krusei*

A- ITS1/4 sequences

| PCCI |       |       |       |       |    |       |    |
|------|-------|-------|-------|-------|----|-------|----|
| PCCI | 0.010 | PC    |       |       |    |       |    |
| PC   | NA    | 0.007 | CI    |       |    |       |    |
| CI   | NA    | 0.011 | 0.011 | PN    |    |       |    |
| PN   | 0.093 | 0.090 | 0.097 | 0.005 | PP |       |    |
| PP   | NA    | NA    | NA    | NA    | NA | PI    |    |
| PI   | 0.048 | 0.046 | 0.050 | 0.115 | NA | NA    | CK |
| CK   | 0.208 | 0.204 | 0.213 | 0.166 | NA | 0.209 | NA |

B- D1/D2 sequences

| PCCI |       |       |       |       |       |       |    |
|------|-------|-------|-------|-------|-------|-------|----|
| PCCI | 0.001 | PC    |       |       |       |       |    |
| PC   | NA    | 0.000 | CI    |       |       |       |    |
| CI   | NA    | 0.001 | 0.003 | PN    |       |       |    |
| PN   | 0.054 | 0.054 | 0.055 | 0.003 | PP    |       |    |
| PP   | 0.033 | 0.032 | 0.033 | 0.040 | 0.000 | PI    |    |
| PI   | 0.015 | 0.015 | 0.016 | 0.051 | 0.030 | NA    | CK |
| CK   | 0.098 | 0.100 | 0.102 | 0.115 | 0.098 | 0.095 | NA |

C- EF-1 $\alpha$  gene fragment

| PCCI |       | PC    |        | CI    |       | PN    |    | PP |  | PI |  | CK |  |
|------|-------|-------|--------|-------|-------|-------|----|----|--|----|--|----|--|
| PCCI | 0.000 |       |        |       |       |       |    |    |  |    |  |    |  |
| PC   | NA    | 0.004 |        |       |       |       |    |    |  |    |  |    |  |
| CI   | NA    | 0.003 | 0.001  |       |       |       |    |    |  |    |  |    |  |
| PN   | 0.019 | 0.020 | 0.0019 | 0     |       |       |    |    |  |    |  |    |  |
| PP   | 0.026 | 0.028 | 0.027  | 0.017 | NA    |       |    |    |  |    |  |    |  |
| PI   | 0.029 | 0.029 | 0.034  | 0.025 | 0.033 | NA    |    |    |  |    |  |    |  |
| CK   | 0.061 | 0.062 | 0.062  | 0.052 | 0.057 | 0.063 | NA |    |  |    |  |    |  |

NA: not applicable
